# Supplementary material for: Antibody screening reveals antigenic proteins involved in Talaromyces marneffei and human interaction
Source: PubMed Central journal article supplement (PMC10315666; doi:10.3389/fcimb.2023.1118979), 2023-06-19
Supplement: DataSheet_1.pdf [file DataSheet_1.pdf]

## Fasta format of P clones

>P1

```
ATGGCTGAGAGCAAGTGTCCCGCTCACCAGCATGTGTTGAAGGCCAACGTCGGCGGTGCTGGTACCAGC
AACCAAGATTGGTGGCCAGACCGCTTGAAGCTTAACATCCTCCGCCAAAACAACCCCGTCTCCAACCCCT
CTGGGCGAGGAATTTGACTATGCCGCCGCCTTCAACAGCCTAGATTACTTTGCGCTCAAGAAGGATATT
CAAGATCTGATGACTGACTCCCAGGACTGGTGGCCGGCTGACTTTGGCCACTATGGTGGTCTCTTTATT
CGTATGGCCTGGCATAAGTGCCGGTACCTACCGAGTCGCCGACGGTCGAGGCGGCGGTGGCGGCGGCCAA
CAGCGCTTTGCTCCTCTCAACAGCTGGCCGACAATGTCGGTCTCGACAAGGCCCGCCGTTTGTGTGG
CCCATCAAGCAGAAATACGGAAACAAGATCTCGTGGGCGGATCTCCTATTGCTCACTGGTAACGTCGCC
CTTGAGTCCATGGGTTTCAAGACCTTTGGTTTCTCTGGCGGTCTGTCGACACATGGGAAGTGGATGAG
TCAGCCAACCTGGGAGGGGAAACCACCTGGTAGCCAATGACGTCCGCTACTCCGGCGGTAAGGCTGAT
CACAAGGATATCCACAACCGTGACTTGGACAAGCCACTGGCCGCTGCCACATGGGTTTGTATCTATGTC
AACCCCGAAGGTCCTGATGGAAACCCCGACCCCATCGCCGCTGCCAAAGATATTGCGACCACCTTCGGT
CGTATGGCCATGAACGACGAGGAGACGGTTGCCCTTATTGCCGGCGGTACACACCTTCGGTAAGACACAC
GGTGTGGCCAGCAGACAAGCTCGGCCCGGAACCAGAGGCTGCAGACATGGCACAACAGGGTTTAGGC
TGGACCAATAGCTTCAAAGCGGCAAGGGTCTGATACCACAACCAGCGGTCTCGAAGTTACCTGGACC
AAGACTCCTACTAAATGGAGTAACCAATTCTTGGAGTACCTCTTCCGCTACGACTGGGAACCTCACTAAG
AGTCTGCCGGCGCCACCAGTGGGTGCCAAAAATGCAGAGGCTTTCATCCCGATGCATTTGACCCA
TCCAAGAAGCGCAAGCCAATGATGCTCAGCAGGATCTTCCCTTCGCTATGACCCTATCTACGAGAAG
ATCTCTCGTTCGCTTTGGAGCACCTTGACCAGTTTGTGATGCGTTTGGCCGTGCCTGGTTCAAGTTA
CTTACCCGTGACCTTGGCCACGAGCTCTCTACATTGGTCCCGAAGTGCTGCAGAGGTTCTACCCTGG
CAGGATCCCCTTCCCGCTGTGACACCACCCCTCATTAGCAATGAAGACGCGTCCGGCTTTGAAACAGCGC
ATTTTGGCCTCGGGTGTCAAACCATCCAGCTTGATTTCCACTGCTTGGGCATCCGCTTCTACGTTTACAG
GGTAGCGACAAGCGCGGCGGTGCCAATGGTGTCTCGCATCCGCTGTCTCCTCAGCGTGAGTGGGCAGTT
AACAACCAACCCCTGGTTGCGCGAGACCCCTTCTGTGCTTGAAGCCATACAGAAACAATTCAATACCTCC
CAGTCTGGAGGCAAGAAGGTGTCTATTGCAGACTTGATTGTTCTCGCTGGTGTGCGCCGCTGTTGAGAAG
GCTGCTCGCAGCAGCCGGATACGCCGTACAGTACCCTTCACTCCCGGTGCGACAGATGCTTCCCAAGAG
CAGACTGACGTCACCTTCCCTCAGCGACATGGAGCCCAATGCTGATGGTTTCCGTAACCTACGGCATTCC
ACCTCTCGCGTTCGTGCTGAGGAGTGGCTCATCGATAAAGGCACAGCTTTTGACCCCTCAGTGCACCAGG
TTGGCCGTTTCTCATCGGCGGTCTCCGTGTCTCAACACAAACTACGACGGTCTGCTCACGGTGTCTTC
ACCCAGCGCCCAGGCAAGTTGACCAACGACTTCTTCGTCAACCTCTTGGACATGAACACCGCATGGAAA
TCAATTGGTGGTGTGACCTCTACGAGGGCACAGATCGCAAGACTGGCGCCAAGAAGTGGACTGCTACT
CGTAACGATCTCGTCTTTGGCTCCAACGCTGAGTTGCGTGTCTATTGCTGAGGTGTACGGTAGCTCTGAT
GGCCAGGAGAAGTTGCTCAAGGACTTTGTGGCTGCTTGGGACAAGGTCATGAACCTGGATCGATTTCGAC
TTGAAGAAGAAGCAATCCACTTCCAGTACCAGCCTTTAA
```

>P3

```
ATGTTCAAGAAGCAGCTAATGCTGCTACTACTGCTGCAACTGGTGGTCAGCAAGATGCTTTCAGTCTCTC
AGATTGACGCACGTGCTGGTGTCAATGCTGCCAAGGGAGACCCTGCAACAGCGCGCCGAGCAGAATGTT
GCACCTGAAGACCGGGACCAAGTTTCGACAGGTTACTGAAACAAGCACAAGCGGTATCTTCTGAATATAAT
CGGCGTATTAAGGATTTCTTGGCCTCCAAGATGCCAAAAGAACGTCGTGAACAGATCGTTTGGCGTTTG
AAGAAGATGATTGTTGAGATCCAGGGTCACTCTGATTACCAACAAGCCATCGAGACTCTCTTGGATTTG
GCTGAGTCATATGCTGGACATGGAAGAGATATCTCTTCGCAAGGAACGACCCGCTACTAAAGGGTTTCATG
GATAGCAAGAAGGACATGCTGATGCGACTCAAGATTTAATCGAGAGATTTGCGAATAGCACATCGACC
GATGACTTCTTTGATTTCGCTCAACACGATCTATCGGATGCCGACCGGTTGAAAGGATGG
TTTAGGGGTGTCGACACTTACATTTCGAAAATGCCTGCGCGAGCAAGGGTTCATCATGCAAGATGAAGCT
AATGACCAGTGAACAAGCTGTACGATGAGGGTTCGCTTCTTGTCTCGAGACCGGTACAGAAGTACACACA
GATCGTATTGCCGATGAAGCCAAGTTTTTGGCCACTCAATTTGACGAAGATCCACAGAACCGAGCTTTC
CGTCAATCTTTGGAGAGACTCTTCAAGGATCTGGGTGAGGACAGTATGGAAAGCCGACGTTCAAGCCC
CATTTGATCAAAGACATTACCAATGTCATCGTTCCTGAGATATTTGAGAATGCCAGCTACATTCCTATT
CCTCGAATTGAGGTTTCCGACCCAGCTGTTGACATGGTTATCGAAAACCTTATCATCGAGAGCGACAAC
TTGATGCCCAATGTTTTAGAATTCGGCACTGACAACCTACTGGCGGTGGGGTTCGTAAGAAGATCAGCAGC
TTCGACGACCACAAGGTTATGATTTCTGCATCTGGCATCCAAGCTGATCTCCGTGATGTGAGCTACTAT
TTCAAGAAGAAGCAAGGATTCCTTCCCTCACCGACATCGGTGTCATGGACATTCCTTGGTGGTTTCA
GGCTTCGGCTTCAAGATTGCTGCCTCCAAAGCACAGAAGAATGACCACAACGCAGTTTTTAAAGCTTGAT
AGTGTCAAGGTCAACGTGAAGAACCTTACCATCAAGCTGAAGAAGTCCAAGCACAAGATGCTTTTTCATC
```

ATCTTCCGACCCATGCTGTTAAATGTTGTCCGACCTGTTCTTGAAAAGTGTGGAGGCCACATTCCTG  
AGGCATTCCAAAAGGCAGACGCATTTGCCTACCAGGTACAGACCGAGGCTCAGCGTGCCCAGGAGACCA  
TGCGTGAGGATCCTGAAAATGCAAAGAATATCTTCGCCCGCTACGCCGATGCTACTCGTCACGTCATCA  
CTGGAGAAGAAGAAGCAGGCCGAAGCTATCGCCGAGCGCGGAACCAAGGTTTCATATGGCAATGACTCAC  
CAGGATGCCATGTTCAAGGACATCAAATTTGCCTGGTGGTGTCACTAACAAAGCTACTGAGTTCAAGGAG  
CTTTCTGCTAAGGGTGATCGCTGGCAATCACCAGTTTTTCAACTGGGGCGGTGCTTCACCCACTAGCAAC  
TTTCCCAAGGCTTCCGCAGTGTCTCGCAAGCCTCATACTGCCGCTGAAAAGTCATCTGCAGGAGAAGTCA  
ACCGATGGTGTCAATGGAGTCGGAGCTAGTGCAGTCAATGGACTCCACGGAGTCTCGACGACTGGAGCC  
ACAGCTAGGGGATCCAGTGGCAAGGCAATGTTGCCAACCAATGGTGTACCAACGGCCAGTCTGCCACC  
AACGGTACTTTCCAGAAGGAAGTCGAGCGTGCTTTTGACGCAAACGGCACCCTCTTCCAACCCTAGGT  
GGTGTTTAA

>P23

ATGTCTCTCTTCCACCGCAGCGGGGACTTTGCTCCCCTCTTCCGTCTCCTCGACGACTATGACCTCCAC  
CGCTCCGGACGCGACGGTCAGACTCCTGCCTCCAGTAGCATCTCAAGCTTCGCGCCACGCTTCGACGTC  
CGCGAGTCCAAGGATGCTTACCATCTGGACGGCGAACTCCCGGCATTGCTCAAAGGACGTTGAAATC  
GAATTCTCCGACCCGACACATTGACCATCAAGGGTCGCTCGGTTCCGGGAATACCACACCCTTCCCAG  
AACGAGAACCCTCATGCTCCTAAGCCCCTTCTGTGGAAGACGCCACCCGAGTCCAGTGACGAGACAGCC  
GTCCAAAAGTCTTCCGACAAAAAAGAGGTCTCGAAGGCTCAGGTTACGGCTACAAGTACTGGGTGAGC  
GAGCGCTCAGTCGGCGAGTTCCATCGCTCATTCAACTTCCCTAGCCGCGTTGATCACAATGGCGTCAAG  
GCTAGTTTGAAGAATGGTGTCTTACGGTGACGGTGCCCCAAGGCTGCCCCCTCTACTAGTCGCAAGATC  
ACAATTGAGTAA

>P6

ATGGAGACTGCGAACGACGCACCCCTCAACTACACTGGAGGGACAACATGAAGCAGACGCTCAGAACAGC  
CGAACTCAACAACCCCAACAATCCCCCGACAGTCAAGAAGACGACGCGAGAAGAAGTACGACCACCATTC  
CCACCACGTCCTGAGACCATCGATCTGCTAAATGAAGGCATTGCCCTTTCGTACCTCCACGGCGAGACCA  
AACCTGCAGTCGCACGCGACAACGGCACTGTCATTGACAGACATTACCGGCCAAACGAATGCAGATGGA  
AGAGACGGTTTTCGTTGCAGGCTTTGGGCGTACCTTGTGGGGCGGGGACTACGAGCAAAGGCTAGTTTG  
AGCCAATGAATAGTGTCTGTTGGTAGTGAAGCCGGGGACACCGCGAGCGTGTAAAGCTTTGCGCCGAAT  
TCCGAGGAAGGCCAGGATGAGAGTCTGTTTGGGGAGTTTGCAAATGAAACCAACGCGCAGGATATTTCT  
GGGAATATTGAAGTCTGGGCTATGATGAATATCCCAGGACGGCAATGAGTACGAATTTGTAGAGGAA  
TTCGAGCCGATAGGGGAAGTGGATGAGGATGGCCAAAATGAAGAATCACTGCTCCAGAAATGGAAGGAA  
AAGCGAAAGCATTACTTTGATTTTATCAGCTGCTGAAAAGCCAATATATACTCGACACGGCGATAGTGGT  
TTGGTTTTCGGGCTACATTGGTATCATACAAACAATCATCTCATTCTATCAGGACGCAGATGACACTTTG  
CGGAGTTTTCAGTGCAGGAGATACGAAGATTGTGATACTCTCAAAGACTCCGCTATATTTGGTTGCTATC  
AGTCGATTATTGGAAGCGAAAGCCATCTGAGACTTCAACTTGATGCGCTGTACATGCAGATATTATCG  
ACCTTGACCCTTCCGGCATTGAACCATCTATTTTCGATCCGGCCATCTACAGATCTAAAAAGACCCCTA  
CAAGGTACCGAGACGTTACTTTCTCGCTCGCCGATCTTTTACCAAGGGCTCTCCACGACTCTCTTA  
TCGGCATTGGAGTGTCTTGAACACTACGCAAAGCACATCGACAAGTCATCAACAATATCTTACTAAGAAAC  
AGAGCGG

>P7

ATGTGCGACGCCCATTTCCACCGTCATGAAAAGCAGGAAATTTCAATTTCCGGACGTGGAGGATTTCTTTGGG  
GTCAATTACGCAAAGGGTCCACAGAGTACTGTAAGTAAAAGTGCCTGCGATTGTATACGTGACTGCGTGC  
CCAACCTTACCGGCCCAATCGGTGGTTATATCACGGGCACAGATACTGCCAGCCCTGCGGATCCAAC  
ACAACCGCAGGAAAGGGTGTCTCCTGTAGCTCAGTCATCAACAAAGACAACCGCCGAGTTCAAAATCA  
GACACATCTACCACCACTAAGGTTCTGCTCCCAGACTCATACTACTTCAACTCTCTCGACAACGTC  
ACCTCGCTGCTCCGACTTTGTTGACCACTCGAGCGATTCTCCTGCGACAACCTTTCTTGACGCTCTTTCA  
ACGCAATCTGCATCTTCCACTTCAACCGATACAGCACTAGACCAGCTCTCGTCTTCTCCCACCTGCTTCT  
CCCCTACTTCTGCAGCCGCATCCACTTCCAATGGTCTTACAGGAGGTGCCAAAGCAGGAATCGCCATT  
GGTGTCTTGTTCGGCGTTGGTCTTATTGCTGGATTGATTCTGTTCTGGCTACATAAGCAGAAGAAGAAC  
AGAGAAGAAGCGGCTGCTGCTGCCGCTGCTGCAGAAAAATGAGAAAATTTACTCCAAGTCAACCCCCACCA  
ATGACTAGCGCTCAGTACCACAGTCAATGGCAGCTTACTCTTCTGCGCCGTCAACTCCAGCGACTGCC  
CCTCAAGTCAAGTGGTCCGATCACTCAGTTCAACCCTTTGTTGAGCCAGCCTGGTGGTGGCAATCCT  
TACGCCGCTGGTGTGTAGGTGCTGCCGTCGGTGGTGTGCTGCTGCTGCTGCCGTTGGCTACAAGTAAAT  
CGGTGAGCTGAACGCCCTTACAGCGGCTCAGCACATGTTCTCTCCTCAGTCTCCTCGTCAAGATCCATTC  
ACTGATCCTGTTAATCCTTTTCGATAATGGAGCGAAACTGCATCTCCTCCTATGCCCCCTGCTAAAGAT

GCATCGTCTCCAGTCAGGGATTTGACGCCTTCGCCTACCGGTAGTGCCCACTTGGCCAGCCCTATT  
GCTGAAGAACCCTCCGCTGGGTGAGTAGAAGCTGCCGCTGCCGCTGCTGTCGAGGTGCTGCTGTTGGC  
GCTGCTGCTGTTGC

>P9

CGTTGTTTCGTGTAACGAATACCTCCATACCTATACTTGTATATCCGACGTACGTACAGCTACGGCTCTT  
CTCCGCTGAACCGAGTTCCTCACATCGTCGATATTCTTGTATCTCAGCAAAAAATAGATCACCAATATCC  
TAAACGATCATCACCACAATGGCAGCCAACGGCAATGGCGGTTCGGCGTTGGCCAGGAGAACATCAAC  
ACAGATATCATCACTCTCACACGATTCTGACGGAAGAGCAGCTTCGAGTCCCAGAAGCTACCGGTGAT  
TTCACCTCTCCTCTGCCACGCCCTGCAATTCGCTTTCAAGTAATTGCCACTACATTCGACGAGCCAGCC  
TCATCAACCTCACCAGGTCTAGCCGGCTCTCCAACATAACCAGGCGACGACCAAAAGAACTCGACGTAA  
TCGGCAACGATGTCTTCATCGCCGCCATGCGCGGCTCAGGCAAGGTGCGCCTGCTCGTCTCCGAAGAAG  
AAGAAGAGGCAATCATCTTCG

>P10 (436)

AAACGACACAAAATGGGCCGTCTCAACGAGTACCAGGTCATCGGGCGCCACTTGCCACCGAGGCAAAC  
CCGACCCCCAAGTTGTACCGCATGCGCATCTTTGCTCCCAACACAGTTGTTGCCAAGTCGCGCTTCTGG  
TACTTCTCACCAAGCTCAAGAAGGTCAAGAAGGCCAACGGTGAGATCGTCAGCCTAACGTGATCTCC  
GAGAAGCGTCCCACCAAGGTCAAGAAGTTCGGTATCTGGTTGCGTTACGACTCTCGCTCCGGCACCAC  
AACATGTACAAGGAGTTCGGTGAGCTCAGCCGAAGTATGCGCTCGACTCTTTGTACCAGGACATGGCT  
GCCCGTACCGTGCCCGCTTCGGCTCCATTACATTTCTCCGCGTCATCGAGATCGAGGACAACGAGAGC  
ATCCGCGCCCTTACATCAAGC

>P11 (433)

GACTCCTCAAAAGAAATGGACGTAGTTTCAAACGAAAGACTGGACGTGAGTTGATCTCGTTGACTCCCA  
AACTTAACGGAAAGACAAAATGTTCTTCGAGGAAGGAGGACACTTTGCCCGTTGCAGGAAAGCAGTCAC  
GTGAGCCCAATCAGTGGCAACGGCGGAGCACCAGGACAGCGAACCAATAAACAGCCGCAAACCG  
GGGAAGCTAATCTAATCCATAGAACGATTTGGAAGCTCTACGATGGCGCCACAGATACCAGCAAACCTAG  
TCATTTTGATACATAACAGAATCCGTGGTATGAGTGAATGGTCTTAGCAGCTGAATAAATCCACAATAT  
AGCCAGCCATAACGAGTCAGCAACTAGTAGTATATGGCGGATAAGATAGAGCTTCCCCACATTTTCAG  
CCACGGCTTGTGCACGTCA

>P12 (440)

ATGGCCATGCTCTCGTCATCATTGTCCCGGCCATCCTCCTGGGCATCCGAACCATGCAATGGGCCAGC  
TCCGTCATCGCCTTGGGTATATACGCCCTACTTTGTGCATCACAGCGCAGTGGCACAACCCCATCTTC  
AATCTAGTCATTTCTGTCTGTCCGTTGTCTTCTTCATCCCTGCTTTTCGTGTCGCCGTTTCATGACCGTG  
CTCAGCAAGTGGGTGCTTTGATTGATATGGTGTTCGTCACCTATGGTTGACGGCATTTCGCTCTCGCC  
GCACAGAGCTACAACCTACGGTGATGTCTACTTTGAAGGCCCCCTCCGGCC

>P13 (441)

GACCTCACAGTCAGCAGACTCAAAAATGTCTCGAGAAGTGGCGAAAGCGGCCAAGTCCGCCCTCGAACGCC  
ATCGCTGTTTTCCAAGAAATACACCGTTCAGTCTACAGGCATCTGGGAAAGTGATCCGACGCACACTGGCC  
GTCGACCCAACCCGATCCACCGGTGTCCCATTTGAACTCTCAATTCGGCAATCCAGCACCAGGCGCCCTA  
CCACCTCAATCATAACGATGAACCCGTCCTCTCCCCGCCGCGACCTCGCAGATAACCCTTACTGGAAA  
CGCGATGTCCGCCGAAATACCCTCAACTCAGCGTTTTTCAGCCAAGGCGACGTTGCCGGACTTTTTGACC  
TTTTGAAATAAGCAGGCACCCAAGGAAGACGCTCTTCAGCTTGGAGAGGCTGGTGAGAAGCAATTGATT  
GCTGCTAAGCAGGAAGGAGATGAAAAA

>p14 z512)

ACGCCTCACGGTGTACGTGATTCAATGGTTGGCACACCGACCACTGGTCAGAGGACCGGTGTCGCGGT  
CGGCCGCCTGGCGCCAAAAACAAAACCTACGAAAGCTACCTTGAAGCTCTTGTCAAGACTACCGCT  
GGGAGCTCTACGAGAGACGCGCAACCCGCCGTACCTGCACCTGCACCTGCTACCTCCGTCCCTGAGCTT  
TCCTATCCTATGTTACGTGTGAATGGCGCTTTGTCCTGCGCAACTCCACGACGTGCATACGTTGGAG  
CGCCATGTTGTCAAAAACCATATCTGGTCAAAACAACATGTCTATGGCAGAAGTGTCCCAATCTTGCA

ACAGAGTATAGCGGCGAAGGTTTGAAGGAGCATTTAGCACAAGCGCATATCCAACCTCTGGCATGGAAG  
TACGGAGATGGGGCCTCCGTTAATGGAAATGGTGAGAAAAGAGATCACCTCACAAGGTTGCTGCTATTGT  
GTCATGAATAAATTATTGAGGAAGAAGCTC

>P15 (485)

TGAAGTTCTACCCTCTCTCGTCTCGTCTCGGTCTTTCTACCCAGGCTCTTGCGAGCTCTTACGTCGATTA  
TGTTACTAAGGACCAGCATGGTCTTACTGTTTATGAGATGGGTCATAAATATCATTAACACCACTACCT  
CAGACTTCAATACCCGGATTACAGAGTTACCAGGTGGTGATCTCAGCAGCATTCTCGAAGGCTGTAATCA  
AGTTACCCAAATAATGAAGCTTGGGCTACGATCTCGATCAGCAACAACGAAACCTTACCAATAATGA  
GTGGCTTAGCCTCTCTCACATATGGAGAAAGGGTGGTTTGAAGATATGTTGAAATGGCTATAAACTAC  
TCTTATCCTGAAGAAGTCACTATTCTTGATTCTGGTTGGTTCTAAGCTGGTTAGCGCTTACAGTCAGCA  
GATGGCTTCTATAGCCTCGGTGCTAAGTTCTTGAGAGACCCCCAGGAAGGTCGAAGTTCAGAGACACTG  
GT

>P17 (332)

ATCCAACCTCAATCCGACAGGATTTTCGTTCTTACGCTATTTCGCATCATCCTAGGCTGTTGTTTCGTGACGA  
CCCCTCATTTGTATACACAACCGCCTCAGATTAAATCACAACAGCACAATGGCCTCCGCGACCACGTTT  
TACGACTTTTCTCCTCCTGACAAAAAAGGAAACCTTACCCCTTGACAGACTACAAGGGCAAAGTCGTC  
CTCGTCTGCAACACAGCATCCAAATGCGGCTTCACGCCCAATTCGCCGGCCTTGAAAACTCTACAAA  
TCTATCGAAGCCAAGCATCCCCGGCGCCTTCACCATCCTGGGTTTTCCCTGCAATCA

>P21 (404)

TCTCCCTCACCACCACACAGTATCTTTGTTTTATCATCTTCATCCATCGGTTTTTGACCCAGAATAA  
TTCTGTCAATTTGATTTCCCATCAAAATTCGCGTCTCATTCATCGAAATCCATAAATTTTTCTGGCCCC  
AGCATTCTCCCGTCAGCCTAAGCTTGGTTGAGCATTAGCAGTGCCAAATCAGAACCATAACTATC  
GATTTTTTCATCACACTGAAAAAACTACATTGATCACAACGCCTGATTCAAAAATGAGTGATCTGGTGC  
CTTTATCAAAATCGTCTGCGATTTTGTGACCTCCATGGCGACTCCCTCCCCCTCAGCACCAGCGCTCG  
GTCCAGACACATTGATCACTATCAAGATTCTTCACAATGACTCGGTTAACCGTCGCTTC

>P24 (440)

ACACGCTAATATTTACAAGGCACGCAACCCCGTACCACGCACCTCTTTATCTTGCTCAAAGCAAGGGTT  
ACTTCAAGGATGAGGGACTTAAAGTTGCCTTGCTAGAACCTAATGACCTTCGGATGTGACCGAGATCA  
TTGGCAGCGGCAAGGTTGACATGGGTTTCAAAGCCATGATCCACACGTTGGCTGCCAAAGCCCGTAACT  
TCCCGGTTACCTCCTTCGGTTCCCTTCTGGACGAGCCGTTTACTGGAGTTGTCTACCTCAAGGACAGCG  
GTATTACCACCGACTTCAAGACCCTCAAGGGCAAACGTATTGGTTACGTTGGAGAGTTTGGCAAAATCC  
AAATCGATGAGCTTACCAAGTACTACGGTATGACTCCCGATGACTACACTGCTGTGCGCTGCGGCATGA  
ACGTCACCAAGGCCATTATCGAGGGG

>P26 (444)

CTACTGGGCTGAACGCAGACACTATGGCACCGGCATCGGCACCGGCACTCAACCTCATCCACCGCCACA  
GACCAGTACCCTCACCCTACCTCCATGCCTCCTGCTAGCACCACCCTACCACCACCAGCGTAAGTGA  
ATGGAGCACCCTAACCGAGACGGAGACGAACACAAAGACAGTTTTTTGTCCCTTGCTCGACTTCTGTGGG  
GACACGTGGGTCGTCGACTGTCTACTCAACTTGGCTTACGACTACTACCTCCGTGTGGACTACGACTCA  
TACTACCACCGTTCTGTCTACGGCACCACGACGACACCTGTTGGTGGTGTGGTCCCGTTGGATCTGA  
GACGGGGCTCGCGTGTCCCTTGCCGGTTACGACTACTCATAACGGAGACTAAGACTACTACTGCAACTGT  
GACTGTGACTGTGGCCGTGACGGCGCCTGG

>P28 (466)

CACTTTGTCATTGTCATCCATTGTGTGTGATCTCTGTGACTGACGACTGACAACCAACCACAGCAGCG  
CCATGTCTGCTACCCTGCAGATGCCAGGCCCTCGGCCCTGCTGCGGACACCAAGAAGGTGCACATCGCCG  
ACACAAAAATGACCTTAAGAATTGGTATAAGCATGTCGACTGGTTGAATGTGTACTTTCATCATCGGTA  
TTCCACTCTATGGATGCATCCAGTCACTCTGGGTTCCCTTGACGCTCAAGACAGCTGTCTGGGCTGTTT  
TCTACTACTTCTATACGGGCTGGGAATCACAGCTGGATAACCCGCTTTTGGGCTCACTGCTCCTACT  
CTGCCACTCTTCTCCTCAGATCTTTCTCGCTGCCGCTGGCGGTGGTGGCGTCCGAGGGCTCCATCCGCT  
GGTGGGCTCGTGGCCACCGTGCTCATACCGTTACACCGACACCGACAAAGG
